# Supplementary material
Source: MDPI journal article supplement (https://www.mdpi.com/2076-3417/13/19/10779)
Supplement: s1 [file s1]

## Article

# Integrated Carbonate-Based CO<sub>2</sub> Capture—Biofixation through Cyanobacteria

Alberto Ughetti <sup>1</sup>, Fabrizio Roncaglia <sup>1,2,3,\*</sup>, Biagio Anderlini <sup>1</sup>, Veronica D'Eusanio <sup>1</sup>, Andrea Luca Russo <sup>4</sup> and Luca Forti <sup>5</sup>

<sup>1</sup> Department of Chemical and Geological Sciences, University of Modena and Reggio Emilia, Via G. Campi 103, 41125 Modena, Italy

<sup>2</sup> Interdipartimental Centre H2-MORE, University of Modena and Reggio Emilia, Via Università 4, 41121 Modena, Italy

<sup>3</sup> INSTM Research Unit of Modena, Via G. Campi 103, 41125 Modena, Italy

<sup>4</sup> Algae S.p.A., Via Tacito 5/E, 41123 Modena, Italy

<sup>5</sup> Department of Life Sciences, University of Modena and Reggio Emilia, Via G. Campi 103, 41125 Modena, Italy

\* Correspondence: fabrizio.roncaglia@unimore.it

## Supplementary information

**Table S1.** Representative elemental analysis of cyanobacteria strains

| Sample name | C (wt%) | N (wt%) | H (wt%) | H (wt%) |
|-------------|---------|---------|---------|---------|
| Spr01_1     | 44.5    | 10.6    | 6.5     | 0.2     |
| Spr01_2     | 44.6    | 10.6    | 6.2     | 0.3     |
| Spr01_3     | 41.8    | 9.4     | 6.0     | 0.1     |
| Spr01_4     | 45.3    | 10.5    | 6.8     | 0.2     |
| Spr01_5     | 43.2    | 10.0    | 6.4     | 0.1     |
| Spr01_6     | 44.9    | 10.6    | 6.6     | 0.2     |
| Spr01_7     | 42.0    | 9.8     | 6.3     | 0.1     |
| Spr01_8     | 44.3    | 11.1    | 6.4     | 0.1     |
| Spr01_9     | 45.9    | 10.6    | 6.7     | 0.1     |
| Spr01_10    | 44.0    | 10.9    | 6.4     | 0.6     |
|             |         |         |         |         |
| Spr02_1     | 48.3    | 9.3     | 6.8     | 0.3     |
| Spr02_2     | 45.7    | 8.4     | 6.6     | 0.2     |
| Spr02_3     | 49.0    | 9.7     | 7.2     | 0.1     |
| Spr02_4     | 48.9    | 10.0    | 7.2     | 0.2     |
| Spr02_5     | 48.2    | 8.9     | 7.1     | 0.2     |
| Spr02_6     | 46.5    | 9.1     | 6.8     | 0.1     |
| Spr02_7     | 48.2    | 8.5     | 6.8     | 0.3     |
| Spr02_8     | 47.2    | 9.4     | 7.1     | 0.1     |
| Spr02_9     | 46.4    | 8.6     | 6.9     | 0.1     |
| Spr02_10    | 48.6    | 9.8     | 6.8     | 0.4     |

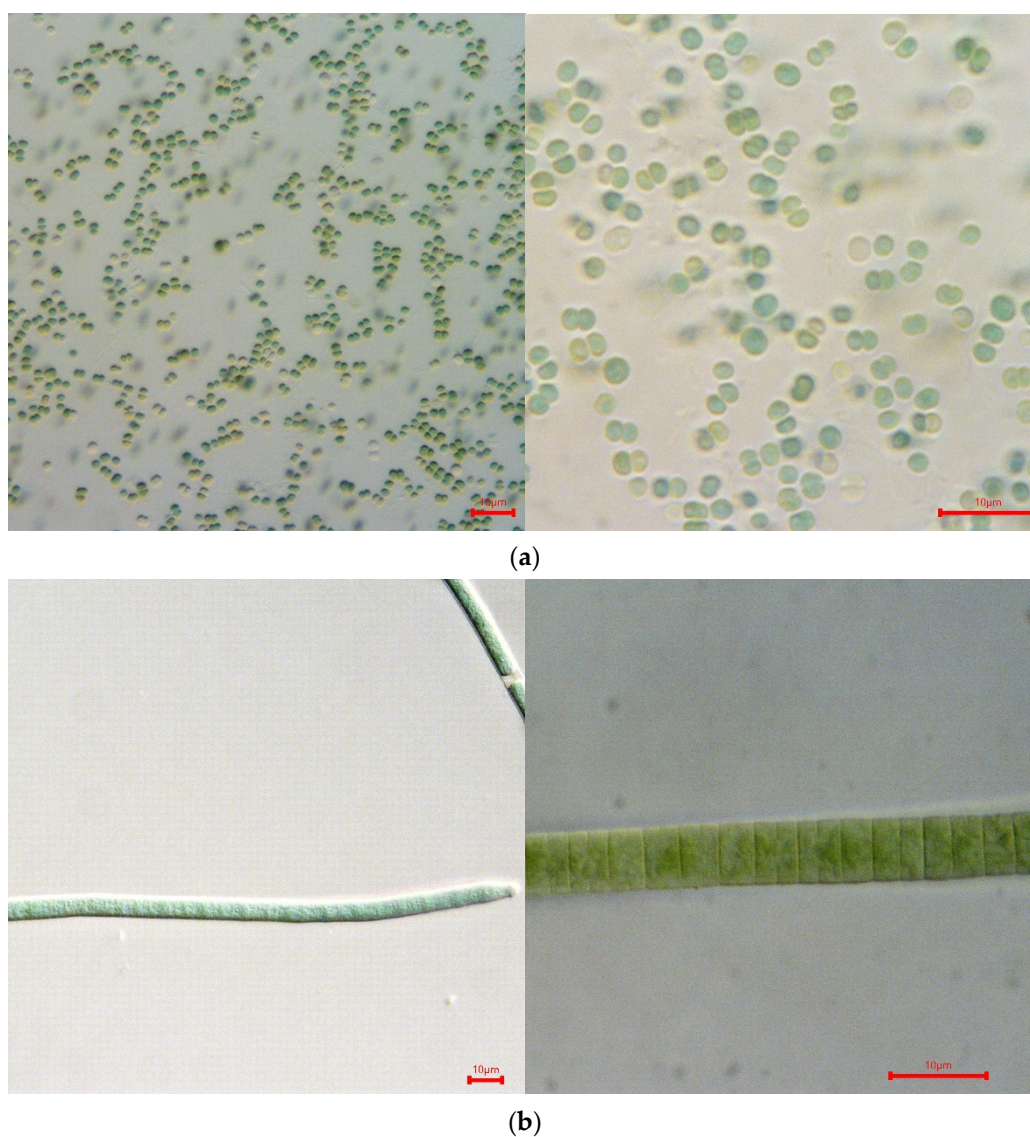

**Figure S1.** Optical microscope photographs of cell morphology for (a) Spr01, and (b) Spr02

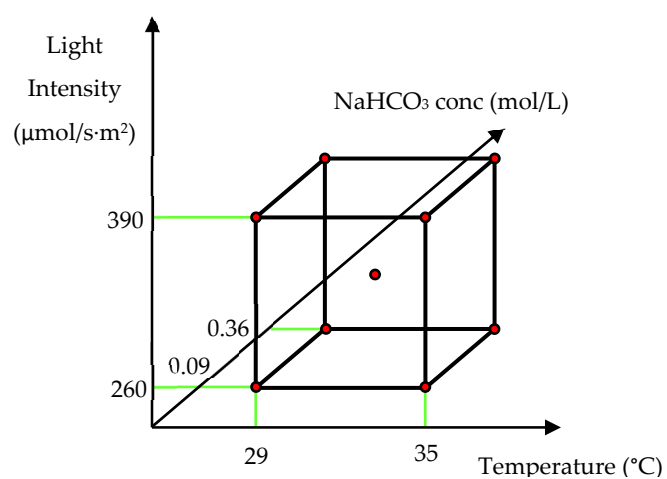

**Figure S2.** Schematic representation of the DoE

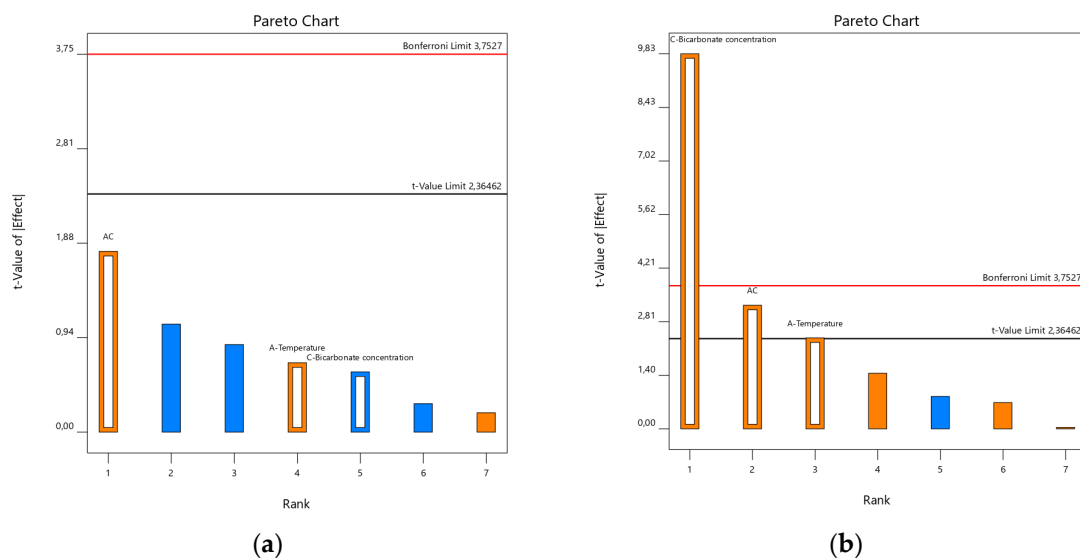

**Figure S3.** Significativity charts relative to Spr01 (a) or Spr02 (b) growth experiments. Independent parameters that affect significantly P are those higher than the t-Value limit.

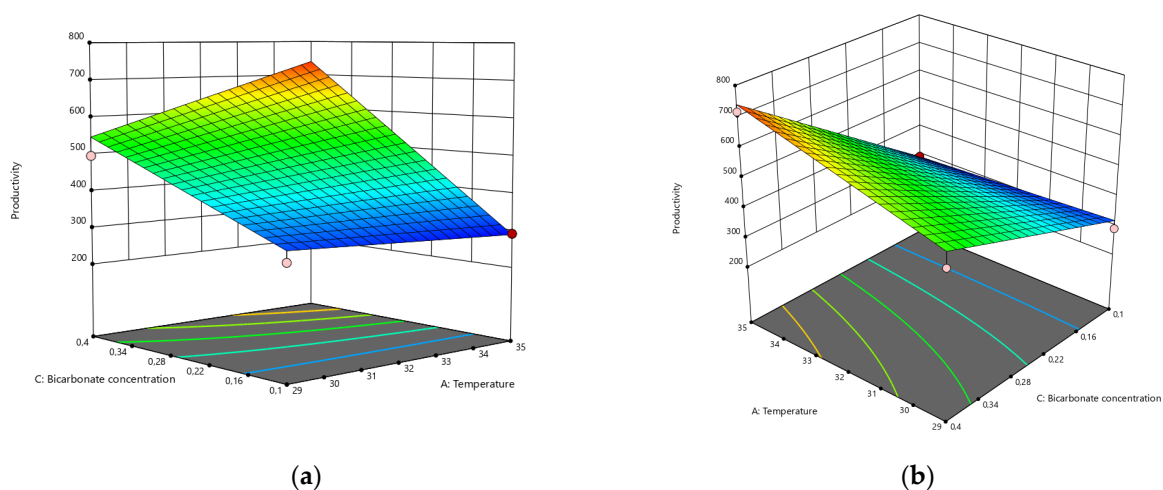

**Figure S4.** Additional representations of the influence of simultaneous variation of  $\text{NaHCO}_3$  concentration and T on P, for Spr02 strain (see also Figure 8).
